# Supplementary material
Source: PubMed Central journal article supplement (PMC5009443)
Supplement: supp_kfv206_toxsci-15-0473-File011.pdf [file supp_kfv206_toxsci-15-0473-File011.pdf]

(A)

**Treatment**

Sesame oil vehicle or

0.001, 0.01, 0.03, 0.1, 0.3, 1, 3, 10, 30  $\mu\text{g}/\text{kg}$  TCDD

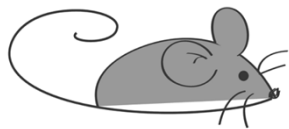

**C57BL/6 Mice**

Female

N=8

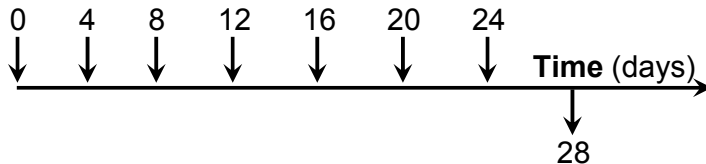

**Time (days)**

28

**Sacrifice & Tissue Collection**

Blood

Intestine

Liver

Gonadal white adipose tissue

Pancreas

(B)

**Treatment**

Sesame oil vehicle or

30  $\mu\text{g}/\text{kg}$  TCDD

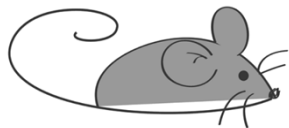

**C57BL/6 Mice**

Female & Male

N=8-16

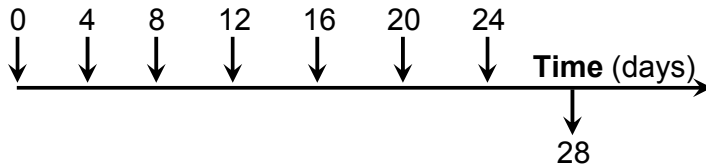

**Time (days)**

28

**Sacrifice & Tissue Collection**

Intestine
